# Supplementary material
Source: ML conference proceedings conference paper supplement (https://openreview.net/forum?id=4qFIkOhq24)
Supplement: supplementary_material [file attachment]

## Sheet: 13B-v2
agreeableness behavior
generated 16 prompts of length 200 tokens with seed 49
for 10 longest prompts (in terms of sentences), sampled responses with seed 50 and estimated the KL divergence based on the logits of the models on the responses
number of sentences in misaligning prompt	average KL divergence between P_minus and P_LLM	error
1	6.33336	0.435448
2	3.44142	0.232863
3	2.77097	0.151041
4	2.34676	0.097341
5	2.08935	0.120899
6	2.07088	0.101145
7	1.96662	0.0751102
8	1.7002	0.0972144
9	1.63811	0.0987174
10	1.47676	0.108817
anti-immigration behavior
generated 16 prompts of length 300 tokens with seed 51
for 10 longest prompts (in terms of sentences), sampled responses with seed 52 and estimated the KL divergence based on the logits of the models on the responses
number of sentences in misaligning prompt	average KL divergence between P_minus and P_LLM	error
1	5.01352	0.405027
2	3.31909	0.256456
3	2.97278	0.245986
4	2.39224	0.127818
5	2.11336	0.126917
6	1.82946	0.10095
7	1.77113	0.109001
8	1.64935	0.0767061
9	1.51305	0.0748214
10	1.21816	0.0740208
[tensor(7.3871),
tensor(4.8663),
tensor(2.5013),
tensor(2.4111),
tensor(1.9466),
tensor(1.9046),
tensor(1.8983),
tensor(1.3738),
tensor(1.6148),
tensor(1.2132),
tensor(1.1582),
tensor(1.2229),
tensor(1.3928),
tensor(1.3376)]]
[[tensor(6.4312),
tensor(2.4138),
tensor(2.5284),
tensor(2.2568),
tensor(2.1138),
tensor(1.7846),
tensor(1.7150),
tensor(1.4961),
tensor(1.5113),
tensor(1.3297),
tensor(1.1990),
tensor(1.5647),
tensor(1.0263),
tensor(1.1290),
tensor(1.0352),
tensor(1.0641)],
[tensor(6.5539),
tensor(4.3409),
tensor(3.0869),
tensor(2.3415),
tensor(2.0701),
tensor(2.0842),
tensor(2.0627),
tensor(1.9206),
tensor(1.7169),
tensor(1.3286),
tensor(1.6520),
tensor(1.1761),
tensor(1.3924),
tensor(1.3828),
tensor(1.6206)],
[tensor(5.8572),
tensor(3.3067),
tensor(2.7800),
tensor(2.4437),
tensor(1.9358),
tensor(2.1535),
tensor(2.2759),
tensor(1.9651),
tensor(1.5177),
tensor(1.0672),
tensor(1.3794),
tensor(0.9733),
tensor(0.9915),
tensor(1.3444),
tensor(1.2987),
tensor(1.0797),
tensor(1.4801)]]
[[tensor(4.1447),
tensor(2.5039),
tensor(2.1513),
tensor(1.9092),
tensor(1.8457),
tensor(2.0877),
tensor(2.1202),
tensor(1.6385),
tensor(1.6442),
tensor(1.1905),
tensor(1.6332),
tensor(1.2811),
tensor(1.2632),
tensor(1.0490),
tensor(0.8643)],
[tensor(5.0762),
tensor(3.0688),
tensor(1.9633),
tensor(1.8285),
tensor(2.0739),
tensor(1.5602),
tensor(1.8890),
tensor(1.5548),
tensor(1.3347),
tensor(1.6122),
tensor(1.4816),
tensor(0.8239),
tensor(1.1661),
tensor(1.4175),
tensor(1.4006),
tensor(1.2543)],
[tensor(7.3589),
tensor(3.7942),
tensor(3.4710),
tensor(2.9757),
tensor(2.5533),
tensor(2.6513),
tensor(1.7396),
tensor(2.1186),
tensor(1.7373),
tensor(1.9216),
tensor(1.1033),
tensor(1.6015),
tensor(1.9964),
tensor(1.4484),
tensor(1.4548)]]
[[tensor(9.1834),
tensor(3.0552),
tensor(2.7498),
tensor(2.3997),
tensor(2.1051),
tensor(2.4321),
tensor(1.9871),
tensor(1.9930),
tensor(1.8874),
tensor(1.9809),
tensor(2.0668),
tensor(2.1129),
tensor(1.7356),
tensor(1.3268),
tensor(1.4130)],
[tensor(3.7823),
tensor(2.5354),
tensor(2.8146),
tensor(2.3697),
tensor(2.0106),
tensor(2.3164),
tensor(1.8416),
tensor(2.2595),
tensor(1.5764),
tensor(1.7672),
tensor(1.3719),
tensor(1.7058),
tensor(1.5164),
tensor(1.1977),
tensor(1.3137),
tensor(0.8405)],
[tensor(5.9262),
tensor(3.3388),
tensor(2.2886),
tensor(1.9946),
tensor(1.5343),
tensor(1.6217),
tensor(1.5639),
tensor(1.4358),
tensor(1.4711),
tensor(1.1832),
tensor(1.4725),
tensor(1.2662),
tensor(1.3538),
tensor(1.3058),
tensor(0.9268)]]
[[tensor(6.2332),
tensor(3.8042),
tensor(2.6749),
tensor(2.3619),
tensor(2.8099),
tensor(2.1250),
tensor(2.4241),
tensor(2.2057),
tensor(1.1423),
tensor(1.9513),
tensor(1.6773),
tensor(1.7379),
tensor(1.6618)],
[tensor(5.5674),
tensor(3.4643),
tensor(2.2857),
tensor(1.5815),
tensor(1.4285),
tensor(1.2950),
tensor(1.5000),
tensor(1.2970),
tensor(1.3687),
tensor(1.3877),
tensor(0.9069),
tensor(1.1608),
tensor(1.3041),
tensor(1.0573),
tensor(1.0743),
tensor(0.8899)],
[tensor(7.1163),
tensor(4.6247),
tensor(2.6054),
tensor(2.5113),
tensor(2.3652),
tensor(1.6472),
tensor(1.7514),
tensor(1.5444),
tensor(1.2681),
tensor(1.4307),
tensor(1.5308),
tensor(1.3467),
tensor(0.9641),
tensor(1.2813),
tensor(1.4459),
tensor(1.7764),
tensor(1.3487),
tensor(1.1416)]]
[[tensor(5.0228),
tensor(3.4042),
tensor(2.9754),
tensor(2.6843),
tensor(2.8278),
tensor(2.5739),
tensor(2.5080),
tensor(2.2508),
tensor(2.3077),
tensor(1.7735),
tensor(1.5022),
tensor(1.5278),
tensor(1.4017),
tensor(1.5459),
tensor(1.2052),
tensor(1.5313),
tensor(1.5869)]]
[[tensor(2.7963),			[4.00770459, 3.09359276, 2.55877225, 2.32674484, 2.18172143, 1.85618385, 1.81275784, 1.60457664]
tensor(2.6849),			[0.27792884, 0.1548217 , 0.10558045, 0.14581795, 0.12326126, 0.17991712, 0.09347043, 0.08812522]
tensor(2.9359),
tensor(1.8613),
tensor(1.6953),
tensor(1.3392),
tensor(2.0298),
tensor(1.6714),
tensor(1.8456),
tensor(1.3615)],
[tensor(3.5899),
tensor(3.3542),
tensor(2.2727),
tensor(1.5896),
tensor(2.5082),
tensor(1.8269),
tensor(1.7797),
tensor(1.4803)],
[tensor(3.6940),
tensor(3.1869),
tensor(2.7705),
tensor(2.2101),
tensor(1.9749),
tensor(1.6629),
tensor(1.3466),
tensor(1.2052),
tensor(1.2600)],
[tensor(6.2945),
tensor(4.3176),
tensor(3.1095),
tensor(2.6696),
tensor(2.5118),
tensor(1.7709),
tensor(1.9721),
tensor(1.6936),
tensor(1.3835),
tensor(1.8563)]]
[[tensor(4.4185),
tensor(2.6213),
tensor(2.6535),
tensor(2.8512),
tensor(2.1655),
tensor(1.9383),
tensor(1.4651),
tensor(1.7065),
tensor(1.5817)],
[tensor(4.1453),
tensor(2.9399),
tensor(2.2009),
tensor(2.1568),
tensor(2.0313),
tensor(1.7780),
tensor(2.1677),
tensor(1.6426),
tensor(1.9545)],
[tensor(3.6803),
tensor(2.5472),
tensor(2.3046),
tensor(3.1508),
tensor(3.0366),
tensor(3.4159),
tensor(2.2374),
tensor(1.9699),
tensor(1.9343),
tensor(2.1028),
tensor(2.1276)],
[tensor(5.4520),
tensor(2.6687),
tensor(3.1500),
tensor(1.9837),
tensor(2.1299),
tensor(1.8500),
tensor(1.4735)]]
[[tensor(3.5724),
tensor(3.2007),
tensor(2.5381),
tensor(2.5505),
tensor(2.1975),
tensor(1.9351),
tensor(1.9775),
tensor(1.1950)],
[tensor(4.3049),
tensor(3.2574),
tensor(2.7822),
tensor(2.3499),
tensor(2.0027),
tensor(1.1845),
tensor(1.4857),
tensor(1.3948)],
[tensor(3.5811),
tensor(2.8259),
tensor(2.0197),
tensor(1.8776),
tensor(1.6934),
tensor(1.7102),
tensor(1.6660),
tensor(2.0864)],
[tensor(5.9215),
tensor(3.3983),
tensor(2.6211),
tensor(2.5143),
tensor(2.0813),
tensor(2.3014),
tensor(1.5377),
tensor(0.9685),
tensor(1.4814)]]
[[tensor(4.2912),
tensor(2.5482),
tensor(2.9664),
tensor(2.5036),
tensor(1.7184),
tensor(1.6692),
tensor(1.2909),
tensor(1.3666)],
[tensor(5.1387),
tensor(3.6121),
tensor(2.8091),
tensor(2.2853),
tensor(2.0480),
tensor(1.6226),
tensor(1.7932),
tensor(1.3549)],
[tensor(4.8192),
tensor(2.2683),
tensor(2.3359),
tensor(2.0766),
tensor(2.0320),
tensor(1.6742),
tensor(1.7185),
tensor(1.3457),
tensor(1.5101)],
[tensor(4.1830),
tensor(2.8412),
tensor(2.4892),
tensor(2.3807),
tensor(1.9991),
tensor(1.9524),
tensor(1.5579)]]
Longer prompts
[[tensor(2.7963),
tensor(2.6849),
tensor(2.9359),
tensor(1.8613),
tensor(1.6953),
tensor(1.3392),
tensor(2.0298),
tensor(1.6714),
tensor(1.8456),
tensor(1.3615),
tensor(1.6637),
tensor(1.1175),
tensor(1.1947),
tensor(0.9860)],
[tensor(3.9356),
tensor(3.2883),
tensor(2.5360),
tensor(1.9301),
tensor(1.7199),
tensor(1.7435),
tensor(1.9038),
tensor(1.5863),
tensor(1.0788),
tensor(1.3730),
tensor(1.0654),
tensor(0.8389),
tensor(0.8522),
tensor(0.9338)],
[tensor(3.8413),
tensor(3.0080),
tensor(2.2112),
tensor(2.0883),
tensor(1.7948),
tensor(1.4051),
tensor(1.4280),
tensor(1.6872),
tensor(1.5359),
tensor(1.1439),
tensor(1.5767),
tensor(1.2077),
tensor(1.4101),
tensor(1.0965)],
[tensor(5.7483),
tensor(4.4034),
tensor(3.7476),
tensor(2.8522),
tensor(2.3449),
tensor(2.2793),
tensor(2.4328),
tensor(1.7726),
tensor(1.6771),
tensor(1.5771),
tensor(1.1495),
tensor(0.8741),
tensor(1.0179),
tensor(1.2266)]]
[[tensor(5.2429),
tensor(5.0921),
tensor(4.8457),
tensor(3.0256),
tensor(2.9332),
tensor(2.0466),
tensor(1.7261),
tensor(1.6694),
tensor(1.8755),
tensor(1.4583),
tensor(1.2471),
tensor(1.0974),
tensor(1.1764),
tensor(0.7790),
tensor(0.8886)],
[tensor(4.4937),
tensor(3.1780),
tensor(2.5022),
tensor(2.0554),
tensor(2.5944),
tensor(2.2363),
tensor(1.7698),
tensor(1.7160),
tensor(1.4440),
tensor(0.9960),
tensor(1.4957),
tensor(1.5772),
tensor(1.3407)],
[tensor(6.0748),
tensor(3.5652),
tensor(2.4419),
tensor(2.7497),
tensor(2.3282),
tensor(2.1375),
tensor(2.0849),
tensor(2.0502),
tensor(1.5226),
tensor(1.2209),
tensor(1.4941),
tensor(1.5023),
tensor(1.5019),
tensor(0.9021)],
[tensor(7.6418),
tensor(2.4882),
tensor(2.2974),
tensor(2.3765),
tensor(1.8796),
tensor(1.5683),
tensor(1.3106),
tensor(1.1111),
tensor(1.2237),
tensor(0.8898),
tensor(0.8445),
tensor(1.1814),
tensor(0.9703),
tensor(1.2571)]]
[[tensor(5.1788),
tensor(2.3419),
tensor(3.4017),
tensor(2.7849),
tensor(2.0770),
tensor(1.7149),
tensor(1.2869),
tensor(1.3806),
tensor(1.5281),
tensor(0.8394),
tensor(1.2889),
tensor(1.2267),
tensor(1.3366)],
[tensor(5.1817),
tensor(3.1408),
tensor(2.8081),
tensor(2.1984),
tensor(1.7662),
tensor(1.8239),
tensor(1.7386),
tensor(1.8489),
tensor(1.3992),
tensor(1.3215),
tensor(1.2054),
tensor(1.1440),
tensor(1.0994)],
[tensor(4.1729),
tensor(3.0867),
tensor(2.1793),
tensor(1.9605),
tensor(1.7044),
tensor(1.8396),
tensor(1.2121),
tensor(1.2344),
tensor(1.2540),
tensor(1.2900),
tensor(1.4197),
tensor(0.8821),
tensor(1.1684),
tensor(0.9862)],
[tensor(4.2892),
tensor(2.6813),
tensor(2.6221),
tensor(1.6750),
tensor(1.4716),
tensor(1.7800),
tensor(1.2891),
tensor(1.4164),
tensor(1.3137),
tensor(1.2441),
tensor(1.4813)]]
[[tensor(3.7546),
tensor(2.4136),
tensor(2.4507),
tensor(1.8576),
tensor(1.8282),
tensor(1.4295),
tensor(0.9814),
tensor(1.1964),
tensor(0.9917),
tensor(1.0360),
tensor(1.1007),
tensor(0.7763),
tensor(1.0637),
tensor(1.2018),
tensor(1.3299)],
[tensor(3.5499),
tensor(3.0892),
tensor(3.2317),
tensor(3.0358),
tensor(1.9442),
tensor(2.4674),
tensor(2.0945),
tensor(1.9121),
tensor(1.7498),
tensor(1.5232),
tensor(1.7592),
tensor(1.3726),
tensor(1.7121),
tensor(1.3565)],
[tensor(6.0049),
tensor(3.5309),
tensor(2.9227),
tensor(2.0495),
tensor(2.4927),
tensor(2.7245),
tensor(2.2974),
tensor(1.9851),
tensor(2.0853),
tensor(1.7051),
tensor(1.1080),
tensor(1.4867),
tensor(1.2153),
tensor(1.1018),
tensor(1.4389),
tensor(1.2153),
tensor(1.3086),
tensor(1.0728)]]
[[tensor(4.5924),
tensor(4.4957),
tensor(3.0034),
tensor(2.6704),
tensor(2.7731),
tensor(1.8655),
tensor(2.1471),
tensor(1.9283),
tensor(2.1596),
tensor(1.3099),
tensor(1.3685),
tensor(1.4219)]]

## Sheet: 13B-v2-chat
agreeableness behavior
generated 16 prompts of length 200 tokens with seed 43
for 10 longest prompts (in terms of sentences), sampled responses with seed 44 and estimated the KL divergence based on the logits of the models on the responses
with aligning prompt	number of sentences in misaligning prompt	average KL divergence between P_minus and P_LLM	error
	1	[29.0071,	[0.967892723187837,
	2	18.02024,	0.987047515492543,
	3	9.16238,	1.05007915709245,
	4	7.11795,	0.784279624783152,
	5	6.16947,	0.616905793464448,
	6	4.7087,	0.522137206105828,
	7	4.32651,	0.636103556262658,
	8	3.67556,	0.342975686368582,
	9	3.2469,	0.308170846447226,
	10	2.6528]	0.350481051698947]
without aligning prompt	number of sentences in misaligning prompt	average KL divergence between P_minus and P_LLM	error
	1	[30.81757,	[0.956048294601272,
	2	17.63812,	1.33273409131754,
	3	9.67001,	0.94079717563883,
	4	7.97747,	0.748431932649857,
	5	7.11424,	0.658175608511894,
	6	5.84322,	0.658384784726986,
	7	5.34031,	0.635523421039696,
	8	4.53731,	0.410065715087228,
	9	3.85404,	0.426210861710492,
	10	3.22953]	0.491382826531412]
anti-immigration behavior
generated 16 prompts of length 200 tokens with seed 45
for 10 longest prompts (in terms of sentences), sampled responses with seed 46 and estimated the KL divergence based on the logits of the models on the responses
with aligning prompt	number of sentences in misaligning prompt	average KL divergence between P_minus and P_LLM	error
	1	[17.00708313,	[0.53943436,
	2	9.38832779,	0.45714352,
	3	7.00026174,	0.47145723,
	4	5.56531649,	0.36790045,
	5	3.54180251,	0.26495547,
	6	3.58703538,	0.32654767,
	7	3.00603249,	0.4363567,
	8	2.25986497,	0.31955309,
	9	1.86461698,	0.1397996,
	10	1.96598511]	0.15509958]
without aligning prompt	number of sentences in misaligning prompt	average KL divergence between P_minus and P_LLM	error
	1	[18.46782846,	[0.73049672,
	2	9.87106485,	0.67277583,
	3	6.84424257,	0.66947896,
	4	5.31289423,	0.56885287,
	5	3.24878634,	0.22999307,
	6	3.48040298,	0.29715268,
	7	2.76850929,	0.40329737,
	8	1.99659915,	0.1699128,
	9	1.78412552,	0.10803825,
	10	1.77770325]	0.13746613]
	Anti-immigration
	Align							Diff								No align
	array([[16.09129143, 8.51745415, 6.15145302, 5.24133873, 3.7612977 ,							array([[-2.69054818, -1.31286466, 0.04609833, 0.24198249, -0.13306604,								array([[18.78183937, 9.83031845, 6.10535479, 4.99935627, 3.89436364,
	2.77359343, 2.24689984, 2.33562589, 2.53568935, 2.82235384],							0.08990826, -0.06027737, 0.0216375 , 0.33767271, 0.42496079],								2.68368506, 2.30717731, 2.31398845, 2.19801664, 2.39739299],
	[16.31627655, 9.03097248, 7.86226845, 7.13565969, 4.05911064,							[-0.87782514, -0.91618115, -0.445032 , 1.1723038 , 0.52723187,								[17.19410133, 9.94715405, 8.30730057, 5.96335602, 3.53187871,
	3.88596678, 2.48419118, 1.71897817, 1.64900851, 1.03560102],							-0.03000411, 0.38049167, 0.3194429 , -0.19382298, 0.20824233],								3.9159708 , 2.10369945, 1.3995353 , 1.84283149, 0.82735872],
	[16.03100395, 8.94798279, 6.13096714, 5.73580599, 2.8627367 ,							[-1.26852024, -1.10476995, 0.21974757, 0.42668456, 0.21445844,								[17.29952431, 10.05275249, 5.9112196 , 5.30912161, 2.64827824,
	4.6703558 , 1.57358932, 1.58462071, 1.65961659, 1.23567533],							0.63953298, -0.20769691, -0.2651816 , 0.17770186, -0.05548106],								4.03082275, 1.78128624, 1.84980226, 1.48191476, 1.29115641],
	[16.99939537, 8.60157681, 5.71923256, 7.21314383, 2.64031649,							[-4.91385365, -0.52213907, -0.93370879, -2.05328178, -0.78313839,								[21.91324997, 9.12371635, 6.65294123, 9.26642609, 3.42345476,
	3.08225465, 2.64076996, 1.15095317, 1.16640115, 2.05112147],							-0.81197041, -0.39180458, -0.17669021, -0.30304903, 0.28732163],								3.89422512, 3.03257465, 1.32764339, 1.46945024, 1.76379991],
	[14.21345043, 10.5579834 , 8.31776905, 4.83627844, 4.50031519,							[ 0.21253197, 1.12631023, 2.25237417, 0.68097049, 1.05510223,								[14.00091839, 9.43167305, 6.06539488, 4.15530777, 3.44521284,
	3.42939878, 2.27015734, 2.50346422, 1.78281248, 2.17657638],							0.50040305, 0.6951896 , 0.50389683, 0.19841336, 0.34287888],								2.92899561, 1.57496774, 1.99956739, 1.5843991 , 1.83369756],
	[18.65702057, 8.08570957, 6.40882683, 4.47444153, 4.44987917,							[-0.20562781, 0.92526013, 3.27243042, 1.3962028 , 2.08466887,								[18.86264801, 7.1604495 , 3.13639641, 3.07823873, 2.36521029,
	4.61314678, 4.62976646, 1.94384539, 2.27473378, 1.84219074],							1.55192208, 1.35284877, 0.43028319, 0.11056611, 0.18152699],								3.0612247 , 3.2769177 , 1.5135622 , 2.16416764, 1.66066372],
	[18.24819183, 12.75330734, 10.22144222, 6.97295284, 4.29748058,							[-1.0712024 , -1.06109524, 0.32352695, 0.66345811, 0.36916965,								[19.31939507, 13.81440258, 9.89791489, 6.30949497, 3.92831087,
	4.34412289, 6.37582731, 4.89240074, 2.56258678, 2.11116123],							0.55009955, 0.45671815, 2.20782638, 0.45852742, 0.23605411],								3.79402328, 5.91910934, 2.68457437, 2.10405946, 1.87510717],
	[15.42547512, 7.38150024, 4.90194893, 3.90113068, 1.80126202,							[-0.82496667, 1.19916964, 0.69672638, 0.81268847, -0.08130029,								[16.2504425 , 6.18233061, 4.20522261, 3.08844233, 1.88256228,
	1.47574508, 1.81829548, 1.30819893, 1.36957669, 1.93570292],							-0.47178224, 0.27277532, -0.2076533 , 0.13710403, 0.18598947],								1.94752729, 1.54552019, 1.51585221, 1.23247266, 1.74971342],
	[20.45161819, 10.11968422, 6.28969526, 4.27780104, 3.31551504,							[-1.51959872, -2.48864007, -2.25108457, 0.19047567, 0.29254428,								[21.9712162 , 12.60832405, 8.54078007, 4.08732557, 3.02297068,
	2.72865462, 2.83362699, 2.69652295, 1.72949851, 2.38353682],							-0.2519545 , 0.56064904, 0.22426593, 0.15734401, 0.18943664],								2.98060918, 2.27297783, 2.47225714, 1.57215452, 2.19410014],
	[17.63710785, 9.8871069 , 7.9990139 , 5.8646121 , 3.7301116 ,							[-1.447842 , -0.67242014, -1.62088656, -1.00726092, -0.61550957,								[19.08494949, 10.5595274 , 9.6199007 , 6.8718729 , 4.34562111,
	4.86711502, 3.18720102, 2.46403956, 1.91624594, 2.06593132],							-0.69983125, -0.68366158, -0.42516911, -0.27554283, -0.11811102],								5.56694603, 3.87086248, 2.88920879, 2.19178867, 2.18404245],
	[17.52827263, 9.91061592, 7.30404711, 4.68564034, 5.58207989,							[-1.17391622, 1.15994525, -0.04511265, 1.08856738, 0.84661585,								[18.70218849, 8.75067043, 7.34915972, 3.59707308, 4.7354641 ,
	3.97502923, 4.01397038, 2.89442897, 2.64072204, 1.87994409]])							1.14165115, 1.28272831, -0.24397901, 0.6258353 , 0.19431128]])								2.83337808, 2.73124218, 3.13840795, 2.01488686, 1.68563282]])
	raw
	[[tensor(16.0913),							[[tensor(-2.6905),								[[tensor(18.7818),
	tensor(8.5175),							tensor(-1.3129),								tensor(9.8303),
	tensor(6.1515),							tensor(0.0461),								tensor(6.1054),
	tensor(5.2413),							tensor(0.2420),								tensor(4.9994),
	tensor(3.7613),							tensor(-0.1331),								tensor(3.8944),
	tensor(2.7736),							tensor(0.0899),								tensor(2.6837),
	tensor(2.2469),							tensor(-0.0603),								tensor(2.3072),
	tensor(2.3356),							tensor(0.0216),								tensor(2.3140),
	tensor(2.5357),							tensor(0.3377),								tensor(2.1980),
	tensor(2.8224),							tensor(0.4250),								tensor(2.3974),
	tensor(2.0807),							tensor(0.1778),								tensor(1.9028),
	tensor(1.3816),							tensor(-0.1497),								tensor(1.5313),
	tensor(1.5825),							tensor(-0.0512),								tensor(1.6337),
	tensor(2.1777),							tensor(0.1710),								tensor(2.0067),
	tensor(2.0252),							tensor(0.0939),								tensor(1.9313),
	tensor(1.5060),							tensor(-0.3529),								tensor(1.8589),
	tensor(1.5052)],							tensor(0.1877)],								tensor(1.3175)],
	[tensor(16.3163),							[tensor(-0.8778),								[tensor(17.1941),
	tensor(9.0310),							tensor(-0.9162),								tensor(9.9472),
	tensor(7.8623),							tensor(-0.4450),								tensor(8.3073),
	tensor(7.1357),							tensor(1.1723),								tensor(5.9634),
	tensor(4.0591),							tensor(0.5272),								tensor(3.5319),
	tensor(3.8860),							tensor(-0.0300),								tensor(3.9160),
	tensor(2.4842),							tensor(0.3805),								tensor(2.1037),
	tensor(1.7190),							tensor(0.3194),								tensor(1.3995),
	tensor(1.6490),							tensor(-0.1938),								tensor(1.8428),
	tensor(1.0356)],							tensor(0.2082)],								tensor(0.8274)],
	[tensor(17.3152),							[tensor(-0.2183),								[tensor(17.5335),
	tensor(12.1527),							tensor(0.0265),								tensor(12.1262),
	tensor(6.2552),							tensor(0.0034),								tensor(6.2518),
	tensor(3.5687),							tensor(-0.4997),								tensor(4.0684),
	tensor(4.0365),							tensor(0.1626),								tensor(3.8740),
	tensor(4.0889)],							tensor(1.3600)],								tensor(2.7289)],
	[tensor(16.0310),							[tensor(-1.2685),								[tensor(17.2995),
	tensor(8.9480),							tensor(-1.1048),								tensor(10.0528),
	tensor(6.1310),							tensor(0.2197),								tensor(5.9112),
	tensor(5.7358),							tensor(0.4267),								tensor(5.3091),
	tensor(2.8627),							tensor(0.2145),								tensor(2.6483),
	tensor(4.6704),							tensor(0.6395),								tensor(4.0308),
	tensor(1.5736),							tensor(-0.2077),								tensor(1.7813),
	tensor(1.5846),							tensor(-0.2652),								tensor(1.8498),
	tensor(1.6596),							tensor(0.1777),								tensor(1.4819),
	tensor(1.2357),							tensor(-0.0555),								tensor(1.2912),
	tensor(2.5197),							tensor(0.2328),								tensor(2.2869),
	tensor(1.5201),							tensor(-0.0758),								tensor(1.5959),
	tensor(1.4555)]]							tensor(-0.0987)]]								tensor(1.5542)]]
	[[tensor(16.9994),							[[tensor(-4.9139),								[[tensor(21.9132),
	tensor(8.6016),							tensor(-0.5221),								tensor(9.1237),
	tensor(5.7192),							tensor(-0.9337),								tensor(6.6529),
	tensor(7.2131),							tensor(-2.0533),								tensor(9.2664),
	tensor(2.6403),							tensor(-0.7831),								tensor(3.4235),
	tensor(3.0823),							tensor(-0.8120),								tensor(3.8942),
	tensor(2.6408),							tensor(-0.3918),								tensor(3.0326),
	tensor(1.1510),							tensor(-0.1767),								tensor(1.3276),
	tensor(1.1664),							tensor(-0.3030),								tensor(1.4695),
	tensor(2.0511),							tensor(0.2873),								tensor(1.7638),
	tensor(2.2473)],							tensor(0.2213)],								tensor(2.0260)],
	[tensor(19.6177),							[tensor(-2.1430),								[tensor(21.7607),
	tensor(9.4219),							tensor(-1.3186),								tensor(10.7405),
	tensor(5.9070),							tensor(-0.8829),								tensor(6.7899),
	tensor(5.2545),							tensor(0.4963),								tensor(4.7581),
	tensor(3.7697),							tensor(-0.4200),								tensor(4.1897),
	tensor(2.4724),							tensor(0.2521),								tensor(2.2203),
	tensor(2.1016),							tensor(-0.0128),								tensor(2.1144),
	tensor(2.3983),							tensor(0.4625),								tensor(1.9357),
	tensor(2.2337)],							tensor(0.4005)],								tensor(1.8331)],
	[tensor(14.2135),							[tensor(0.2125),								[tensor(14.0009),
	tensor(10.5580),							tensor(1.1263),								tensor(9.4317),
	tensor(8.3178),							tensor(2.2524),								tensor(6.0654),
	tensor(4.8363),							tensor(0.6810),								tensor(4.1553),
	tensor(4.5003),							tensor(1.0551),								tensor(3.4452),
	tensor(3.4294),							tensor(0.5004),								tensor(2.9290),
	tensor(2.2702),							tensor(0.6952),								tensor(1.5750),
	tensor(2.5035),							tensor(0.5039),								tensor(1.9996),
	tensor(1.7828),							tensor(0.1984),								tensor(1.5844),
	tensor(2.1766),							tensor(0.3429),								tensor(1.8337),
	tensor(1.5190)],							tensor(0.2658)],								tensor(1.2532)],
	[tensor(18.6570),							[tensor(-0.2056),								[tensor(18.8626),
	tensor(8.0857),							tensor(0.9253),								tensor(7.1604),
	tensor(6.4088),							tensor(3.2724),								tensor(3.1364),
	tensor(4.4744),							tensor(1.3962),								tensor(3.0782),
	tensor(4.4499),							tensor(2.0847),								tensor(2.3652),
	tensor(4.6131),							tensor(1.5519),								tensor(3.0612),
	tensor(4.6298),							tensor(1.3528),								tensor(3.2769),
	tensor(1.9438),							tensor(0.4303),								tensor(1.5136),
	tensor(2.2747),							tensor(0.1106),								tensor(2.1642),
	tensor(1.8422),							tensor(0.1815),								tensor(1.6607),
	tensor(1.8383),							tensor(0.3806),								tensor(1.4577),
	tensor(1.2183)]]							tensor(0.1178)]]								tensor(1.1004)]]
	[[tensor(18.2482),							[[tensor(-1.0712),								[[tensor(19.3194),
	tensor(12.7533),							tensor(-1.0611),								tensor(13.8144),
	tensor(10.2214),							tensor(0.3235),								tensor(9.8979),
	tensor(6.9730),							tensor(0.6635),								tensor(6.3095),
	tensor(4.2975),							tensor(0.3692),								tensor(3.9283),
	tensor(4.3441),							tensor(0.5501),								tensor(3.7940),
	tensor(6.3758),							tensor(0.4567),								tensor(5.9191),
	tensor(4.8924),							tensor(2.2078),								tensor(2.6846),
	tensor(2.5626),							tensor(0.4585),								tensor(2.1041),
	tensor(2.1112)],							tensor(0.2361)],								tensor(1.8751)],
	[tensor(15.4255),							[tensor(-0.8250),								[tensor(16.2504),
	tensor(7.3815),							tensor(1.1992),								tensor(6.1823),
	tensor(4.9019),							tensor(0.6967),								tensor(4.2052),
	tensor(3.9011),							tensor(0.8127),								tensor(3.0884),
	tensor(1.8013),							tensor(-0.0813),								tensor(1.8826),
	tensor(1.4757),							tensor(-0.4718),								tensor(1.9475),
	tensor(1.8183),							tensor(0.2728),								tensor(1.5455),
	tensor(1.3082),							tensor(-0.2077),								tensor(1.5159),
	tensor(1.3696),							tensor(0.1371),								tensor(1.2325),
	tensor(1.9357),							tensor(0.1860),								tensor(1.7497),
	tensor(0.9220),							tensor(-0.0738),								tensor(0.9958),
	tensor(1.1252)],							tensor(0.4269)],								tensor(0.6983)],
	[tensor(20.4516),							[tensor(-1.5196),								[tensor(21.9712),
	tensor(10.1197),							tensor(-2.4886),								tensor(12.6083),
	tensor(6.2897),							tensor(-2.2511),								tensor(8.5408),
	tensor(4.2778),							tensor(0.1905),								tensor(4.0873),
	tensor(3.3155),							tensor(0.2925),								tensor(3.0230),
	tensor(2.7287),							tensor(-0.2520),								tensor(2.9806),
	tensor(2.8336),							tensor(0.5606),								tensor(2.2730),
	tensor(2.6965),							tensor(0.2243),								tensor(2.4723),
	tensor(1.7295),							tensor(0.1573),								tensor(1.5722),
	tensor(2.3835),							tensor(0.1894),								tensor(2.1941),
	tensor(1.3450)],							tensor(-0.1643)],								tensor(1.5093)],
	[tensor(16.2244),							[tensor(-0.4552),								[tensor(16.6796),
	tensor(6.9307),							tensor(0.9138),								tensor(6.0169),
	tensor(4.9021),							tensor(0.0988),								tensor(4.8033),
	tensor(3.3729),							tensor(0.3128),								tensor(3.0600),
	tensor(1.7269),							tensor(-0.1165),								tensor(1.8434),
	tensor(2.3578),							tensor(0.1344),								tensor(2.2234),
	tensor(1.7637),							tensor(0.2301),								tensor(1.5336),
	tensor(1.7874),							tensor(-0.0504),								tensor(1.8378),
	tensor(2.5128)]]							tensor(0.3360)]]								tensor(2.1767)]]
	[[tensor(18.6600),							[[tensor(-1.7649),								[[tensor(20.4249),
	tensor(7.8647),							tensor(-1.8350),								tensor(9.6997),
	tensor(5.8190),							tensor(-0.3942),								tensor(6.2131),
	tensor(4.4236),							tensor(0.2994),								tensor(4.1242),
	tensor(4.0430),							tensor(0.4802),								tensor(3.5628),
	tensor(3.7132),							tensor(1.2642),								tensor(2.4490),
	tensor(3.3350),							tensor(0.6079),								tensor(2.7271),
	tensor(4.6471),							tensor(0.6311),								tensor(4.0160),
	tensor(2.2553)],							tensor(0.3537)],								tensor(1.9016)],
	[tensor(17.6371),							[tensor(-1.4478),								[tensor(19.0849),
	tensor(9.8871),							tensor(-0.6724),								tensor(10.5595),
	tensor(7.9990),							tensor(-1.6209),								tensor(9.6199),
	tensor(5.8646),							tensor(-1.0073),								tensor(6.8719),
	tensor(3.7301),							tensor(-0.6155),								tensor(4.3456),
	tensor(4.8671),							tensor(-0.6998),								tensor(5.5669),
	tensor(3.1872),							tensor(-0.6837),								tensor(3.8709),
	tensor(2.4640),							tensor(-0.4252),								tensor(2.8892),
	tensor(1.9162),							tensor(-0.2755),								tensor(2.1918),
	tensor(2.0659),							tensor(-0.1181),								tensor(2.1840),
	tensor(1.2356)],							tensor(0.0793)],								tensor(1.1563)],
	[tensor(17.5283),							[tensor(-1.1739),								[tensor(18.7022),
	tensor(9.9106),							tensor(1.1599),								tensor(8.7507),
	tensor(7.3040),							tensor(-0.0451),								tensor(7.3492),
	tensor(4.6856),							tensor(1.0886),								tensor(3.5971),
	tensor(5.5821),							tensor(0.8466),								tensor(4.7355),
	tensor(3.9750),							tensor(1.1417),								tensor(2.8334),
	tensor(4.0140),							tensor(1.2827),								tensor(2.7312),
	tensor(2.8944),							tensor(-0.2440),								tensor(3.1384),
	tensor(2.6407),							tensor(0.6258),								tensor(2.0149),
	tensor(1.8799)],							tensor(0.1943)],								tensor(1.6856)],
	[tensor(16.6024),							[tensor(-2.3757),								[tensor(18.9782),
	tensor(11.1281),							tensor(0.3258),								tensor(10.8022),
	tensor(7.0831),							tensor(0.2524),								tensor(6.8307),
	tensor(3.8215),							tensor(0.1602),								tensor(3.6613),
	tensor(3.9658),							tensor(0.0529),								tensor(3.9129),
	tensor(5.0290),							tensor(0.9346),								tensor(4.0944),
	tensor(3.5854),							tensor(0.3530),								tensor(3.2324),
	tensor(2.3942)]]							tensor(0.4178)]]								tensor(1.9764)]]
	believes-AIs-are-not-an-existential-threat-to-humanity
	[16.02580786, 8.45959086, 6.69083204, 5.55991743, 4.2900346 , 3.73704638, 3.31133438, 2.6530751 , 2.54288197, 2.44619642]												[19.1076148 , 12.84599056, 8.47207713, 6.75043311, 4.955509 , 4.24500914, 3.5424695 , 2.84483229, 2.8181936 , 2.62248229]
	[1.08167631, 0.32503541, 0.38812189, 0.32193869, 0.40038788, 0.31463022, 0.20787161, 0.25455039, 0.13496466, 0.17438159]												[1.02343422, 0.86708857, 0.53433652, 0.40550328, 0.56467085, 0.48672239, 0.32566156, 0.3663554 , 0.26586843, 0.29733963]
	[[tensor(11.1197),							[[tensor(-6.6204),					[[tensor(17.7401),
	tensor(7.9869),							tensor(-5.9579),					tensor(13.9448),
	tensor(7.3082),							tensor(-3.0609),					tensor(10.3691),
	tensor(5.7777),							tensor(-1.2772),					tensor(7.0549),
	tensor(3.2846),							tensor(0.0871),					tensor(3.1975),
	tensor(3.8563),							tensor(0.4233),					tensor(3.4330),
	tensor(3.2044),							tensor(-0.0604),					tensor(3.2647),
	tensor(2.9965),							tensor(0.0519),					tensor(2.9446),
	tensor(2.0305),							tensor(0.1911),					tensor(1.8395),
	tensor(2.0962),							tensor(0.1655),					tensor(1.9306),
	tensor(2.4721),							tensor(0.0869),					tensor(2.3852),
	tensor(2.0983),							tensor(0.3391),					tensor(1.7592),
	tensor(1.9930),							tensor(0.3830),					tensor(1.6100),
	tensor(1.4996),							tensor(-0.0024),					tensor(1.5020),
	tensor(1.1704),							tensor(-0.0085),					tensor(1.1788),
	tensor(0.9829)],							tensor(-0.0199)],					tensor(1.0028)],
	[tensor(15.4403),							[tensor(-2.6279),					[tensor(18.0683),
	tensor(6.9760),							tensor(-3.9640),					tensor(10.9400),
	tensor(4.2862),							tensor(-2.5779),					tensor(6.8641),
	tensor(4.7271),							tensor(-1.5254),					tensor(6.2525),
	tensor(4.0878),							tensor(-0.6300),					tensor(4.7179),
	tensor(3.8586),							tensor(-1.4225),					tensor(5.2812),
	tensor(3.9760),							tensor(-0.6702),					tensor(4.6462),
	tensor(2.4446),							tensor(-0.3158),					tensor(2.7604),
	tensor(2.7447),							tensor(-0.8954),					tensor(3.6401),
	tensor(2.5406),							tensor(-0.4755),					tensor(3.0161),
	tensor(3.3466),							tensor(-0.4707),					tensor(3.8173),
	tensor(1.5701),							tensor(-0.2175),					tensor(1.7876),
	tensor(2.4263)],							tensor(-0.1952)],					tensor(2.6215)],
	[tensor(18.9585),							[tensor(2.5258),					[tensor(16.4327),
	tensor(9.0274),							tensor(-0.2563),					tensor(9.2837),
	tensor(6.5109),							tensor(1.0510),					tensor(5.4599),
	tensor(5.7504),							tensor(-0.3953),					tensor(6.1458),
	tensor(3.1974),							tensor(-0.2199),					tensor(3.4173),
	tensor(2.4836),							tensor(-0.2138),					tensor(2.6973),
	tensor(1.7887),							tensor(-0.0478),					tensor(1.8365),
	tensor(2.6080),							tensor(-0.0153),					tensor(2.6233),
	tensor(2.4779),							tensor(-0.1281),					tensor(2.6060),
	tensor(2.1366)],							tensor(0.0874)],					tensor(2.0492)],
	[tensor(18.0388),							[tensor(-1.0829),					[tensor(19.1217),
	tensor(9.5673),							tensor(-3.8652),					tensor(13.4325),
	tensor(7.5529),							tensor(-1.7306),					tensor(9.2835),
	tensor(7.0555),							tensor(-1.4099),					tensor(8.4654),
	tensor(6.3563),							tensor(-2.3494),					tensor(8.7057),
	tensor(5.3246),							tensor(-1.2846),					tensor(6.6091),
	tensor(3.1522),							tensor(-0.8127),					tensor(3.9649),
	tensor(2.5416),							tensor(-1.0928),					tensor(3.6343),
	tensor(1.7036),							tensor(-0.4107),					tensor(2.1143),
	tensor(2.2030)]]							tensor(-0.4587)]]					tensor(2.6617)]]
	[[tensor(21.0408),							[[tensor(-3.2307),					[[tensor(24.2715),
	tensor(9.9003),							tensor(-4.0440),					tensor(13.9444),
	tensor(7.3008),							tensor(-0.9872),					tensor(8.2880),
	tensor(3.8381),							tensor(-1.3684),					tensor(5.2066),
	tensor(2.8863),							tensor(-0.5713),					tensor(3.4576),
	tensor(4.1007),							tensor(-0.2672),					tensor(4.3679),
	tensor(3.0350),							tensor(-0.3444),					tensor(3.3795),
	tensor(2.7828),							tensor(-0.3963),					tensor(3.1791),
	tensor(2.5998),							tensor(-0.8834),					tensor(3.4831),
	tensor(2.5494),							tensor(-0.5899),					tensor(3.1393),
	tensor(2.6760),							tensor(-0.1150),					tensor(2.7910),
	tensor(1.6991),							tensor(-0.0828),					tensor(1.7818),
	tensor(1.3172)],							tensor(-0.0379)],					tensor(1.3551)],
	[tensor(14.4175),							[tensor(-4.5538),					[tensor(18.9714),
	tensor(9.8017),							tensor(-5.0824),					tensor(14.8841),
	tensor(6.9494),							tensor(-1.9697),					tensor(8.9190),
	tensor(4.3671),							tensor(-0.8782),					tensor(5.2453),
	tensor(3.9916),							tensor(-1.1304),					tensor(5.1220),
	tensor(3.0775),							tensor(-0.6874),					tensor(3.7649),
	tensor(2.9384)],							tensor(0.0947)],					tensor(2.8437)],
	[tensor(10.2302),							[tensor(-2.3368),					[tensor(12.5670),
	tensor(7.2800),							tensor(-2.3203),					tensor(9.6003),
	tensor(5.9519),							tensor(-0.3641),					tensor(6.3160),
	tensor(5.2652),							tensor(-0.5362),					tensor(5.8013),
	tensor(3.6154),							tensor(0.6495),					tensor(2.9659),
	tensor(3.0185),							tensor(0.5539),					tensor(2.4646),
	tensor(3.2391),							tensor(0.9637),					tensor(2.2755),
	tensor(1.7649),							tensor(0.2443),					tensor(1.5206),
	tensor(2.4491),							tensor(0.7749),					tensor(1.6742),
	tensor(1.9671),							tensor(0.3754),					tensor(1.5917),
	tensor(2.3257),							tensor(0.5903),					tensor(1.7353),
	tensor(1.8671)],							tensor(0.1965)],					tensor(1.6706)],
	[tensor(16.3185),							[tensor(-4.4104),					[tensor(20.7289),
	tensor(8.2694),							tensor(-3.0086),					tensor(11.2781),
	tensor(5.6143),							tensor(-2.4496),					tensor(8.0639),
	tensor(4.3804),							tensor(-1.5509),					tensor(5.9313),
	tensor(3.0677),							tensor(-1.3099),					tensor(4.3775),
	tensor(3.1028),							tensor(-0.4704),					tensor(3.5732),
	tensor(3.2497),							tensor(-0.7932),					tensor(4.0429),
	tensor(2.2745),							tensor(-0.3890),					tensor(2.6635),
	tensor(2.7791),							tensor(-0.7239),					tensor(3.5030),
	tensor(3.5083),							tensor(0.1380),					tensor(3.3703),
	tensor(3.0322),							tensor(-0.2189),					tensor(3.2511),
	tensor(2.4484),							tensor(-0.5437),					tensor(2.9921),
	tensor(2.4870),							tensor(-0.4214),					tensor(2.9084),
	tensor(2.4443),							tensor(-0.6214),					tensor(3.0657),
	tensor(2.4434),							tensor(-0.6565),					tensor(3.0999),
	tensor(1.9905),							tensor(-0.1805),					tensor(2.1710),
	tensor(2.0374),							tensor(-0.5096),					tensor(2.5470),
	tensor(1.6815)]]							tensor(-0.0418)]]					tensor(1.7233)]]
	[[tensor(20.0841),							[[tensor(-3.1205),					[[tensor(23.2046),
	tensor(7.0993),							tensor(-4.2542),					tensor(11.3535),
	tensor(5.9393),							tensor(-3.6055),					tensor(9.5448),
	tensor(5.8406),							tensor(-2.9175),					tensor(8.7581),
	tensor(5.2890),							tensor(-1.6600),					tensor(6.9490),
	tensor(5.5989),							tensor(-1.5654),					tensor(7.1643),
	tensor(4.4301),							tensor(-1.1369),					tensor(5.5669),
	tensor(4.8114),							tensor(-0.8746),					tensor(5.6860),
	tensor(3.3087),							tensor(-1.0311),					tensor(4.3398),
	tensor(3.3776),							tensor(-1.4144),					tensor(4.7920),
	tensor(2.4002),							tensor(-0.8856),					tensor(3.2858),
	tensor(1.5093)],							tensor(-0.5958)],					tensor(2.1051)],
	[tensor(14.3298),							[tensor(-3.4808),					[tensor(17.8105),
	tensor(9.1953),							tensor(-8.6291),					tensor(17.8243),
	tensor(7.5913),							tensor(-2.3576),					tensor(9.9489),
	tensor(5.7312),							tensor(0.3256),					tensor(5.4056),
	tensor(6.3895),							tensor(0.3117),					tensor(6.0778),
	tensor(2.6863),							tensor(-0.2512),					tensor(2.9376),
	tensor(3.7438),							tensor(0.3830),					tensor(3.3608),
	tensor(1.8397),							tensor(0.4557),					tensor(1.3840),
	tensor(2.9169),							tensor(0.1562),					tensor(2.7607),
	tensor(2.3508),							tensor(0.3597),					tensor(1.9912),
	tensor(1.7803),							tensor(-0.2554),					tensor(2.0357),
	tensor(1.6010)],							tensor(0.1355)],					tensor(1.4655)],
	[tensor(14.6974),							[tensor(-6.4335),					[tensor(21.1309),
	tensor(9.2939),							tensor(-7.5644),					tensor(16.8584),
	tensor(8.8524),							tensor(-1.7302),					tensor(10.5827),
	tensor(7.2331),							tensor(-1.2498),					tensor(8.4829),
	tensor(4.7263),							tensor(-0.9625),					tensor(5.6888),
	tensor(3.3402),							tensor(-0.5817),					tensor(3.9219),
	tensor(3.2944),							tensor(0.2076),					tensor(3.0869),
	tensor(2.4668),							tensor(0.4143),					tensor(2.0525),
	tensor(2.4186),							tensor(0.1972),					tensor(2.2213),
	tensor(1.7324),							tensor(0.0497),					tensor(1.6827),
	tensor(2.0243),							tensor(-0.4012),					tensor(2.4254),
	tensor(2.3940),							tensor(-0.0502),					tensor(2.4443),
	tensor(1.8596),							tensor(-0.5244),					tensor(2.3841),
	tensor(1.6513)],							tensor(-0.2618)],					tensor(1.9131)],
	[tensor(14.1188),							[tensor(-3.3213),					[tensor(17.4401),
	tensor(6.6766),							tensor(-2.7726),					tensor(9.4492),
	tensor(7.3177),							tensor(-2.1706),					tensor(9.4882),
	tensor(5.6757),							tensor(-1.7776),					tensor(7.4533),
	tensor(6.5616),							tensor(-0.0197),					tensor(6.5813),
	tensor(5.7002),							tensor(0.5202),					tensor(5.1801),
	tensor(4.1901),							tensor(0.3855),					tensor(3.8047),
	tensor(4.4515),							tensor(0.2194),					tensor(4.2320),
	tensor(2.4503),							tensor(0.2173),					tensor(2.2330),
	tensor(2.8028),							tensor(0.0875),					tensor(2.7153),
	tensor(2.3659),							tensor(0.1625),					tensor(2.2035),
	tensor(1.3496),							tensor(0.2500),					tensor(1.0996),
	tensor(1.6433),							tensor(0.2355),					tensor(1.4077),
	tensor(1.4373),							tensor(0.3086),					tensor(1.1287),
	tensor(3.1312),							tensor(0.6891),					tensor(2.4421),
	tensor(2.0404)]]							tensor(0.5382)]]					tensor(1.5022)]]
	[[tensor(15.6736),							[[tensor(-3.9996),					[[tensor(19.6732),
	tensor(9.5242),							tensor(-3.6957),					tensor(13.2200),
	tensor(7.0333),							tensor(0.9587),					tensor(6.0746),
	tensor(4.8026),							tensor(0.2360),					tensor(4.5666),
	tensor(3.9711),							tensor(0.0333),					tensor(3.9378),
	tensor(2.3793),							tensor(0.4227),					tensor(1.9566),
	tensor(2.1287),							tensor(-0.6606),					tensor(2.7893),
	tensor(2.1849),							tensor(-0.0883),					tensor(2.2733),
	tensor(2.4116),							tensor(0.1998),					tensor(2.2117),
	tensor(2.3383),							tensor(0.1935),					tensor(2.1448),
	tensor(2.3195),							tensor(-0.3300),					tensor(2.6495),
	tensor(1.7736)],							tensor(-0.1525)],					tensor(1.9262)],
	[tensor(14.6666),							[tensor(-1.7346),					[tensor(16.4012),
	tensor(7.5450),							tensor(-3.9364),					tensor(11.4815),
	tensor(7.7237),							tensor(-2.7505),					tensor(10.4742),
	tensor(7.3111),							tensor(-1.2310),					tensor(8.5421),
	tensor(6.0431),							tensor(-0.0099),					tensor(6.0530),
	tensor(5.9298),							tensor(-0.5144),					tensor(6.4441),
	tensor(3.0345),							tensor(-0.3332),					tensor(3.3677),
	tensor(3.8548),							tensor(-0.1024),					tensor(3.9572),
	tensor(3.4427),							tensor(-0.3292),					tensor(3.7719),
	tensor(2.9654),							tensor(-0.3141),					tensor(3.2795),
	tensor(3.5167),							tensor(-0.1926),					tensor(3.7093),
	tensor(2.2006),							tensor(-0.3924),					tensor(2.5930),
	tensor(1.9131)],							tensor(-0.0570)],					tensor(1.9701)],
	[tensor(12.8596),							[tensor(-0.8701),					[tensor(13.7297),
	tensor(4.7461),							tensor(-1.0281),					tensor(5.7742),
	tensor(4.6007),							tensor(-0.1315),					tensor(4.7322),
	tensor(2.3571),							tensor(0.0290),					tensor(2.3281),
	tensor(1.5122),							tensor(-0.1105),					tensor(1.6226),
	tensor(3.0132),							tensor(-0.5639),					tensor(3.5771),
	tensor(1.7630),							tensor(-0.0744),					tensor(1.8374),
	tensor(1.8529)],							tensor(0.0587)],					tensor(1.7942)],
	[tensor(14.1049),							[tensor(-2.6736),					[tensor(16.7785),
	tensor(8.4518),							tensor(-3.1918),					tensor(11.6436),
	tensor(9.3971),							tensor(-1.9388),					tensor(11.3359),
	tensor(4.0187),							tensor(-0.7754),					tensor(4.7941),
	tensor(3.5572),							tensor(-1.1709),					tensor(4.7281),
	tensor(3.4063),							tensor(-0.6227),					tensor(4.0291),
	tensor(5.6630),							tensor(-0.0093),					tensor(5.6724),
	tensor(2.5787),							tensor(-0.5097),					tensor(3.0884),
	tensor(2.7766),							tensor(-0.0429),					tensor(2.8196),
	tensor(1.9723),							tensor(0.0327),					tensor(1.9396),
	tensor(1.6921),							tensor(0.1734),					tensor(1.5187),
	tensor(5.3229),							tensor(0.8723),					tensor(4.4506),
	tensor(1.9290),							tensor(0.3994),					tensor(1.5296),
	tensor(3.1514),							tensor(0.7152),					tensor(2.4362),
	tensor(2.7980)]]							tensor(0.5531)]]					tensor(2.2449)]]
